# Supplementary material
Source: publisher site journal article supplement (https://www.dovepress.com/get_supplementary_file.php?f=282926.docx)
Supplement: Supplementary file 1 [file get_supplementary_file.php]

**Supplementary data**

**Questionnaire for insulin injection techniques and self-reported hypoglycemia**

Case No. ______

1. **Demographic data**

Age ____ years Sex Male/Female

Education level

| □ Less than high school  □ High school  □ Bachelor degree or college  □ Higher than bachelor degree |
| --- |

Type of DM □ T1DM □ T2DM

1. **Insulin injection techniques**

Location of insulin injection site

□ Abdomen □ Thigh □ Arm □ Hip □ Mixed

Needle length

□ 4 mm □ 5 mm □ 6 mm □ 8 mm □ Others

Lack of insulin rotation

□ No □ Yes

Reused insulin needle

□ Never □ 2-3 times/needle □ 4-5 times/needle □ > 5 times/needle

Received annual injection sites checked from healthcare professionals

□ No □ Yes

Performing self-monitoring of injection site

□ No □ Yes

**3) Frequency of self-monitoring blood glucose (SMBG)**

□ None □ Less than 1 time per week

□ At least 1 time per week □ At least once daily

□ At least 2 times per day □ At least 4 times per day

1. **Self-reported hypoglycemia**

4.1) Number of severe hypoglycemic episode during the past 3 months

*(Severe hypoglycemia was defined as an episode of hypoglycemia that led to unconsciousness or required assistance by a third person)*

□ None

□ Yes, _____times within 3 months

4.2) Number of level 2 hypoglycemic episodes in the previous 3 months

□ None

□ 1-2 times over the last 3 months

□ 3-6 times over the last 3 months

□ 7-12 times over the last 3 months

□ More than once per week

□ Everyday

4.3) Did the patient skip meal before symptomatic hypoglycemic episodes?

□ No □ Yes

4.4) Did the patient intake alcohol before symptomatic hypoglycemic episodes?

□ No □ Yes

4.5) Did the patient exercise intensively before symptomatic hypoglycemic episodes?

□ No □ Yes

4.6) Did the patient mismatch the dose of insulin with the actual meal intakes?

□ No □ Yes

Note: If the patients replied ‘*No*’ in 4.3-4.6, the unexplained hypoglycemia will be defined.
